# Supplementary material for: Large interannual changes in supraglacial drainage basin areas and channels that flow downstream uphill: lessons from field surveys of moulin-connected streams on the Greenland Ice Sheet
Source: Copernicus journal article supplement (doi:10.5194/egusphere-2024-3676), 2024-12-06
Supplement: Supplementary file [file egusphere-2024-3676-AC4-supplement.pdf]

## Author response to reviewer comment: Reviewer 2

In this study, Mejia and others present field observations of supraglacial streams in the Paakitsoq region of the Greenland ice sheet that show how the drainage paths of supraglacial lakes can change considerably between different melt seasons. The study provides valuable insights into the processes by which supraglacial streams form and transport melt water from lakes to moulins, which is very relevant information for understanding and modeling the impact of surface melt on ice dynamics. The manuscript is well written but would benefit from a few clarifications especially in the methods section.

We would like to thank the reviewer for taking the time to review our manuscript and provide suggestions for its improvement. We have incorporated the reviewers comments in the revised manuscript which has improved the clarity of the methods section. Below we have responded to each point raised by the reviewer with our text written in [blue](#).

Sincerely,  
Jessica Mejia on behalf of all coauthors

### General comments

- 1) Section 2.1 describes the stream mapping associated to Mars and ArcSav lakes in 2017 and 2018, but it does not mention Radical lake, the results of which are presented in Figs. 7 and 12. Was this data acquired in the same in-situ way or from e.g. WorldView imagery? The same is true for all the streams in the 2019 melt season. Although not delineated in any map (why not?), the 2019 stream paths are described in the last paragraph of the results section. At this point, the reader has to guess that this information is based on the WorldView image e.g. in the background of Figure 12. It would be good to state this explicitly. If that is how the stream paths were determined for 2019, would it be possible to use such a remote sensing approach to map streams on a larger scale or over more melt seasons?

We have revised section 2.1 to reflect the suggested reorganization while incorporating an elaboration of mapping methods. Specifically, we have divided the section into three paragraphs to differentiate our mapping methods: (1) roving differential gps surveys (2) coordinate determination of supraglacial stream flow paths with hand-held inReach device with elevations extracted from ArcticDEM, and (3) supraglacial stream flow determined from satellite imagery with elevations similarly extracted from ArcticDEM. Because we use different methods of elevation determination in this study (field vs. a remote sensing product) we compare the data in Figure 3 b, d.

- 2) Section 2.2 is slightly short for the reader to fully understand what was done. In particular, I am wondering about two points:

- a) Does the 'steepest descent algorithm' (L98) refer to the Wang and Liu (2006) method? If so, I suggest citing them again, otherwise it is not clear that their method was not only used for filling the depressions. Furthermore, 'the steepest descent algorithm' commonly refers to a search algorithm in optimization that has little to do with how it is used here, so I also suggest avoiding this specific term.

The reference to the steepest descent algorithm does refer to Wang and Liu (2006) we have added the suggested citation at the end of that sentence. We have also rephrased this sentence as:

"The resulting depression-free DEM was then used to calculate supraglacial flow accumulation by calculating the steepest descent for all neighboring cells across our domain, flow is then implemented as into and out of the grid elements with the steepest slope Wang and Liu, 2006), producing a predicted channel network of supraglacial stream locations and intersections."

b) How were the DEM-predicted catchments 'divided according to the moulins identified in the field' and 'corrected for supraglacial streams' (L101-102)? There must be a set of rules that were followed, for instance that streams were not allowed to cross catchment boundaries, etc.? How was this done and how much ambiguity was there in this correction? Potentially, it could also be helpful and interesting to show the difference between the DEM-predicted catchments and the corrected one. If the corrections were substantial, it would mean that topography alone was not a good predictor of flow paths in this case, which could strengthen the message of this study.

We have expanded our discussion of catchment delineation in Section 2.2 to cover these points raised by the reviewer. Specifically, we will add a citation to L98, revised our phrasing for the steepest ascent algorithm, and expand upon how we refined the predicted catchment by including the rules we used to make adjustments. We will also elaborate on the phrase in L101-102 which states that the predicted catchments were "divided" according to moulins identified (explanation below). Finally, we have included a description of how much each catchment varied from the predicted boundary following manual adjustment in section 2.2. We have also included a new figure (now Figure 2) that shows the calculated flow routing across our study area, generated catchment bounds, and the catchment boundaries used in this study (shown in Figure 1). We also include two insets to show examples of where the generated catchment boundaries were adjusted.

*To quickly address the reviewers point, this is referring to the fact that our methodology to calculate the catchment requires a single outlet point which was set to the ice sheet margin, rather than the location of each individual moulin. Therefore the resulting algorithm produced one very large catchment spanning beyond our study area. We used these predicted flow paths in conjunction with observed moulin locations "divide" this large catchment into the moulin-drained supraglacial catchments discussed in the manuscript.*

3) The manuscript has many figures with partially redundant information, perhaps this could be condensed. For example, the Mars and ArcSav stream paths are depicted in Figures 1, 2, 3, 8, 9 and 12. It takes some effort from the reader to figure out the differences between those.

We have taken the reviewers suggestion, and that of reviewer #1 who suggested combining several figures, and condensed some of the figures presented in the results section. Specifically, we have combined Figures 2,4,5 into a single figure, Figure 3 in the revised manuscript. Now instead of the reader needing to refer to several individual figures and referring back to the map with photo locations, all items are in a single figure with subplots arranged so they correspond to the image acquisition location on the main map. We have also similarly combined Figures 8, 10, and 11 (now Figure 7 in the revised manuscript) so that field photos taken along the Mars and ArcSav Lake transects are displayed in the same figure as the map-view of the study area. With this adjustment we have consolidated the information previously displayed in 6 figures into the two incorporated in the revised manuscript.

While these adjustments do address some concerns, there remains the suggestion of combining the map-view of Mars and ArcSav lakes with the transect elevation data as we did for Radical Catchment. While there is some redundancy because we do superimpose the background imagery on the stream's plan view observations (e.g., subplots a and c of Figures 4 and 8) we keep the background imagery so readers can clearly distinguish between the lake shoreline, terminal moulins, and contextualize the elevation profile with its location along the lake drainage path. Moreover, in our attempts to consolidate the elevation profiles for Mars and ArcSav lakes with the larger map view we were unable to find an arrangement or scale that preserved details in both the elevation plots and (Figure 9) the map (e.g., elevation contours, symbols marking field photo locations, lake shoreline, and discrete sampling locations).

Furthermore, it is not clear why Figure 7 has a different design than Figures 3 and 9. Does it not show the same information, just for Radical stream instead of Mars/ArcSav? Why is there no 2018 profile for Radical stream?

Figure 7 had a different design than Figure 3 had for two reasons, (1) to consolidate the map view and combine it with stream profile data and (2) because we used a different methodology to determine the elevation profile of Radical River (elevations extracted from ArcticDEM) compared to those of Mars and ArcSav lakes where we performed a roving differential GPS survey and therefore could resolve elevations along those streams very precisely. We also chose this representation which consolidated the Radical River data into a single figure for 2017 because this data mainly serves as a baseline to discuss the changes in flow routing observed in 2018. Because we made this choice in our presentation of data from each location for 2017, we then use the same display format for 2017 to maintain consistency.

Why is there no 2018 profile for Radical stream?

There is a 2018 profile for Radical River, (Figure 12b (original submission) and Figure 11b in the revised submission).

Specific comments

L35: 'through' instead of 'though'? [Fixed](#)

L117: Technically, topography does not have a direction, perhaps use slope, downward gradient or similar. (Same in L126 and maybe elsewhere.) [Updated all instances](#)

L127-128: '... the river flowed downslope...' could be 'down the surface slope' because technically the river always flows downslope. [Updated](#)

L148: 'stream flowed upslope' sounds like water actually flowed uphill, see L127-128; there might be other such examples that I did not point out. I understand what is meant, and it is a very minor comment, but I still think it could be more precise. Or it could be clarified once in the beginning. [We added a clarification of this statement at the first occurrence on L182](#)

L159-160: 'Mars Lake drained into Phobos Moulin...' is a slightly confusing sentence. Should it be Radical Moulin instead of Radical River? And it must have drained the Radical catchment, it could be more clear to add that name again. [We merged this sentence with the sentence before hand to keep Radical River as the subject which clarifies the fact that Radical River drains into Mars Lake, which then ultimately drains into Phobos moulin.](#)

L162-163: Do these numbers about all tributary streams come from the DEM-predicted flow path calculations? [Yes, we have clarified this in the text](#)

L186-188: The whole sentence 'Larger July lake extents before drainage coincided with...' is unclear. How can a larger lake extent coincide with a location of 'upslope streamflow'? Maybe what is meant is that it coincides with 'upslope streamflow' in time? The 'together indicate' does not have a proper

subject in the sentence, unless e.g. `coincided` is changed to `coinciding`, if that is what is meant. [ArcSav Lake's extent did coincide with the location of the lake extent, we rephrased this sentence to read "We interpret these observations as indicating that the drainage of ArcSav Lake began when lake water level reached the lowest point on the drainage divide \(on the northern shoreline\) and initiated a spillover event which formed ArcSav stream."](#)

L220-222: Why is snow deposition favored on top of snowplugs? It is not just the albedo that is responsible for snowplugs becoming high points? [In the case of Mars Lake, large snow dunes formed on the northern lake shoreline which likely trapped additional snow over the snow bridges than would have occurred on a flat surface](#)

L222: Shallow or flat? Shallow topography usually means that the ice thickness is small. This formulation was used in other places, too. [We rephrased to "where the slope of large-scale topography is shallow" to clarify this point.](#)

L250: `strong` slopes seems like an unusual formulation; high slopes is more common. [We rephrased to high slopes](#)

L275: Hoffman and Price (2014) may not be the appropriate reference here. Without knowing the article I would think it is a study that observed the timing of daily peak sliding speeds, which is not at all the case. [Thank you for catching this error, we have updated the citation to Hoffman et al., 2011 which is the correct citation for that sentence.](#)

L306-307: `We find that ... is magnified at higher elevations ... where surface slopes are shallow and moulin density is low.` seems too strong of a statement here since this study analyzed three catchments in one particular location. I would expect such a formulation from a study that compared the flow of many more streams on a range of elevations and surface slopes. It is something that was discussed here and is expected given the presented data, but it is not a direct finding.

[We have adjusted our phrasing, changing "is" to "can"](#)
